# Supplementary material for: Rationale and development of an on-line quality assurance programme for colposcopy in a population-based cervical screening setting in Italy
Source: PubMed Central journal article supplement (PMC3701540; doi:10.1186/1472-6963-13-237), 2013-06-28
Supplement: 1472-6963-13-237-S1.pdf [file 1472-6963-13-237-S1.pdf]

**Table Performance indicators routinely audited in colposcopy clinics of the Emilia-Romagna Region of Italy and observed data**

| No. | Definition                                                                                                                                    | Regional average | Range between the 11 health care districts |
|-----|-----------------------------------------------------------------------------------------------------------------------------------------------|------------------|--------------------------------------------|
| 1   | Proportion of women with abnormal Pap smear results attending the clinic*                                                                     | 88%              | 69-100%                                    |
| 2   | Proportion of women with Pap smear results of HSIL and carcinoma attending the clinic                                                         | 91%              | 78-100%                                    |
| 3   | Proportion of women with abnormal Pap smear results undergoing colposcopy within 4 weeks                                                      | 58%              | 12-97%                                     |
| 4   | Proportion of women with colposcopic findings interpreted as abnormal-grade 2 and suspected invasive cancer undergoing biopsy                 | 95%              | 86-100%                                    |
| 5   | Proportion of women with CIN3 and carcinoma and colposcopic findings interpreted as abnormal-grade 2 and suspected invasive cancer            | 65%              | 33-84%                                     |
| 6   | Proportion of women with colposcopic findings interpreted as abnormal-grade 2 and suspected invasive cancer diagnosed with CIN3 and carcinoma | 43%              | 33-58%                                     |
| 7   | Proportion of women with Pap smear results of HSIL and carcinoma undergoing biopsy                                                            | 92%              | 82-100%                                    |
| 8   | Proportion of women with colposcopic findings interpreted as negative and partial or total invisibility of the SCJ                            | 37%              | 5-64%                                      |
| 9   | Proportion of women with histological diagnosis established before destructive therapy                                                        | 90%              | 74-100%                                    |
| 10  | Proportion of women with CIN biopsy and final histological diagnosis of invasive carcinoma                                                    | 1%               | 0-4%                                       |

HSIL, high-grade squamous intraepithelial lesion; CIN3, cervical intraepithelial neoplasia grade 3; SCJ, squamocolumnar junction.

\* Abnormal Pap smear results included the following: atypical squamous cells of undetermined significance; atypical squamous cells-cannot exclude high-grade lesion; atypical glandular cells; low-grade squamous intraepithelial lesion; HSIL; and carcinoma.

NOTE 1: The colposcopic categories referred to as negative, abnormal-grade 2, and suspected invasive cancer were equivalent to the categories of normal colposcopic findings, abnormal colposcopic findings-major changes, and colposcopic features suggestive of invasive cancer according to the International Federation for Cervical Pathology and Colposcopy classification of 2002 [Walker P, Dexeus S, De Palo G, Barrasso R, Campion M, Girardi F, Jakob C, Roy M: International terminology of colposcopy: an updated report from the International Federation for Cervical Pathology and Colposcopy. *Obstet Gynecol* 2003, 101:175-177].

NOTE 2: The data refer to the year 2010, when the colposcopy quality assurance programme was developed, with the exception of indicator No. 8 (year 2004). All indicators, part of which were taken from the guidelines set out for the NHS Cervical Screening Programme [Luesley D, Leeson S: *Colposcopy and programme management: guidelines for the NHS Cervical Screening Programme. Second edition*. Sheffield: NHS Cancer Screening Programmes; 2010], were calculated from cross-tabulated audit data collected by the regional Department of Health. National standards (according to the Italian Group for Cervical Cancer Screening, GISCi) are available only for indicators No. 1 (acceptable level  $\geq 80\%$ ) and No. 2 (acceptable level  $\geq 90\%$ ). The regional average level of quality of colposcopy service is generally acceptable, but with considerable variation between health care districts. This is especially the case for indicators No. 3, No. 5 (representing colposcopy sensitivity for CIN3 and carcinoma), and No. 8.
