# Supplementary material for: Rationale and development of an on-line quality assurance programme for colposcopy in a population-based cervical screening setting in Italy
Source: PubMed Central journal article supplement (PMC3701540; doi:10.1186/1472-6963-13-237), 2013-06-28
Supplement: 1472-6963-13-237-S2.pdf [file 1472-6963-13-237-S2.pdf]

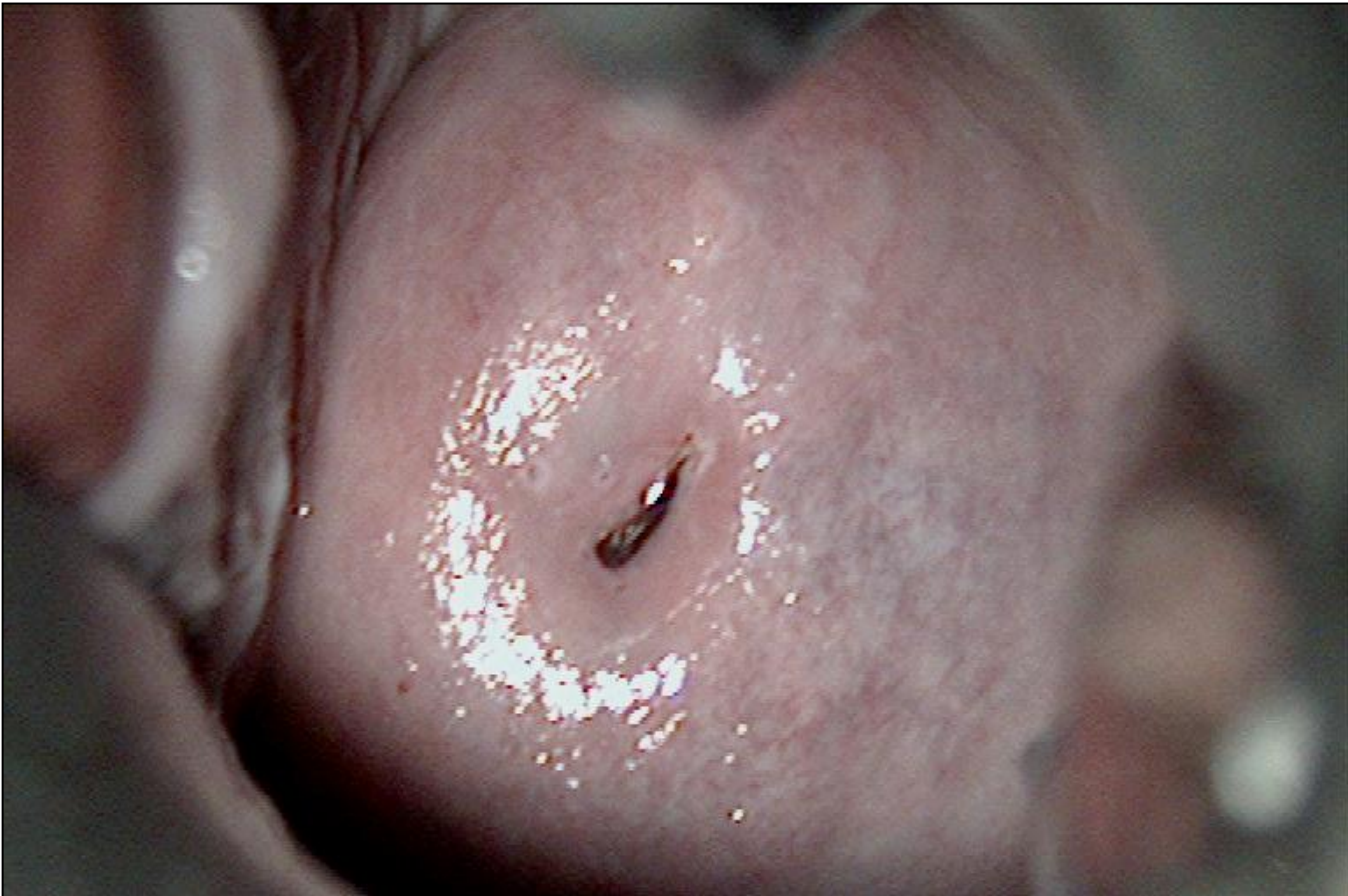

**Digital colposcopic photographs representing the four categories of the International Federation for Cervical Pathology and Colposcopy classification of 2002**

**Figure 1.**

**Normal colposcopic findings (Negative)**

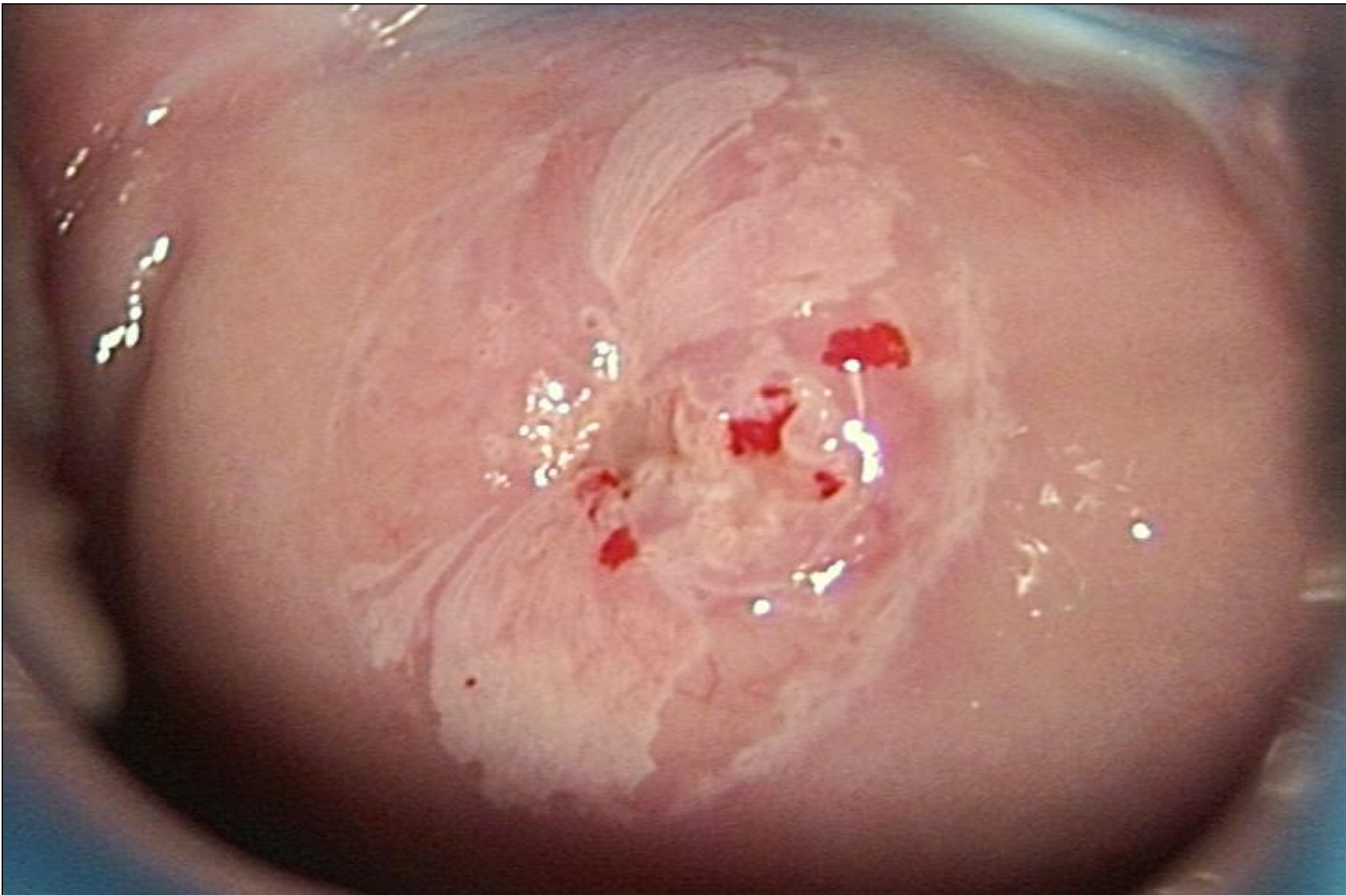

**Digital colpophotographs representing the four categories of the International Federation for Cervical Pathology and Colposcopy classification of 2002**

**Figure 2.**

**Abnormal colposcopic findings-minor changes (Abnormal, grade 1)**

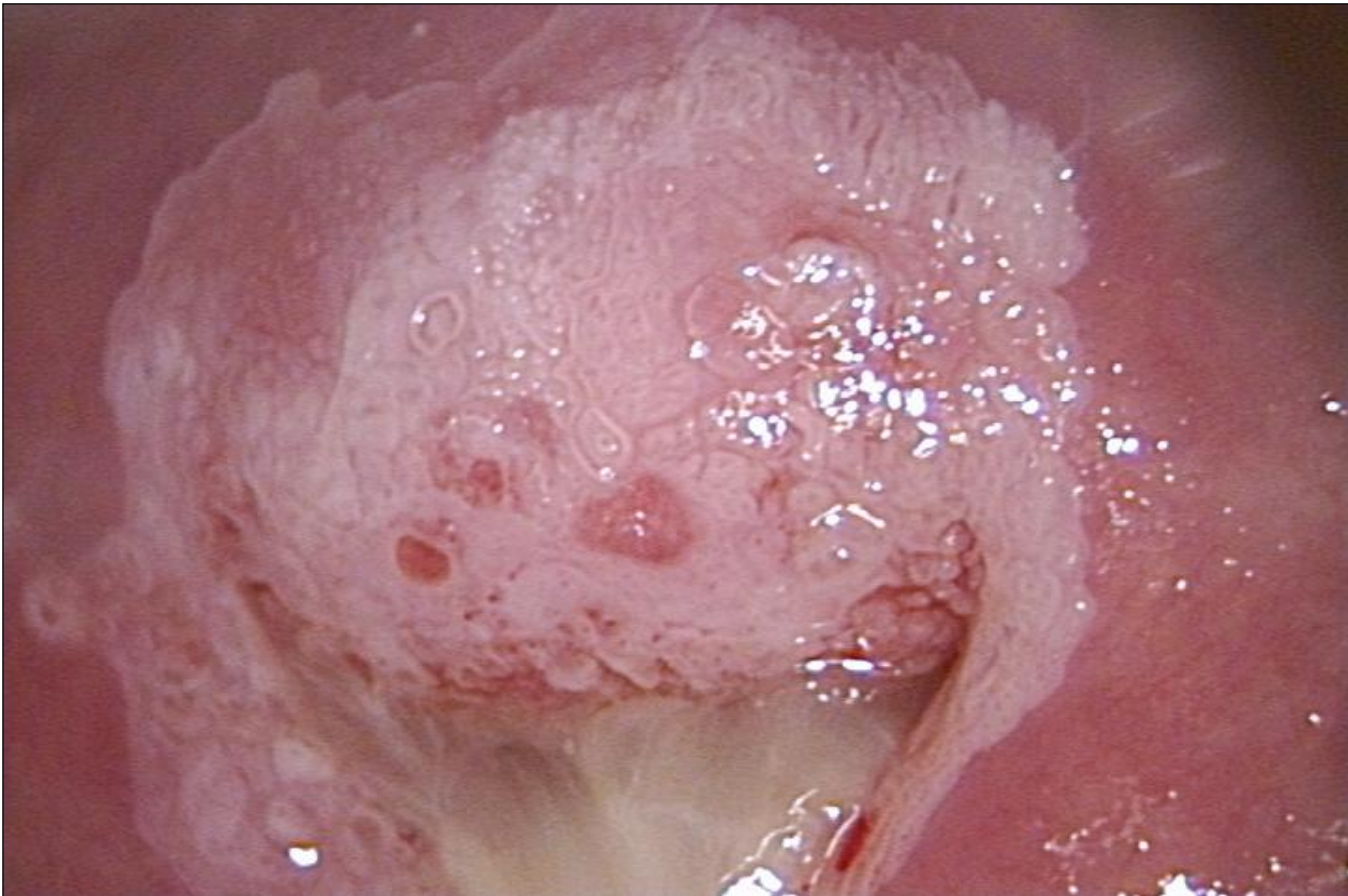

**Digital colposcopic photographs representing the four categories of the International Federation for Cervical Pathology and Colposcopy classification of 2002**

**Figure 3.**

**Abnormal colposcopic findings-major changes (Abnormal, grade 2)**

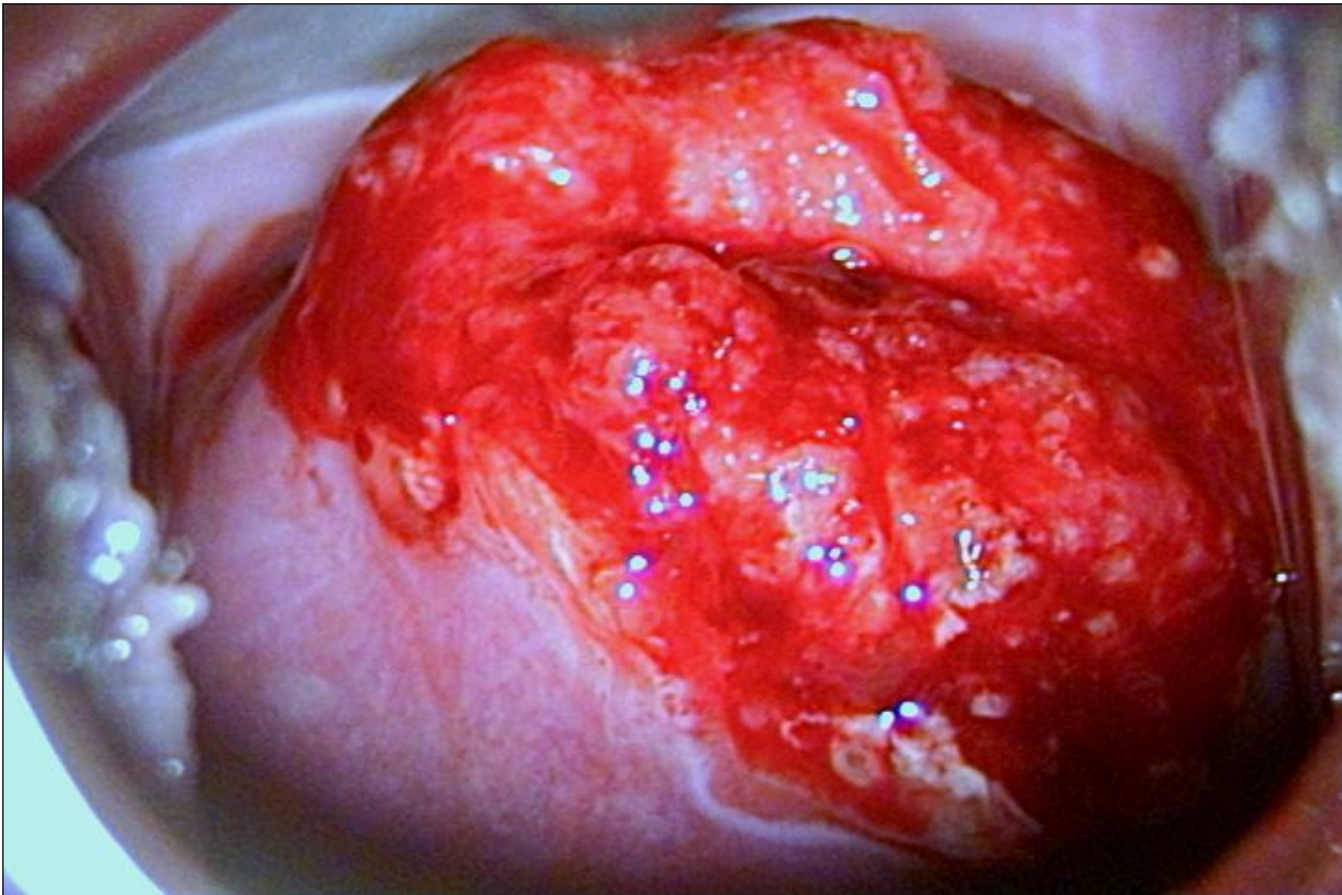

**Digital colpophotographs representing the four categories of the International Federation for Cervical Pathology and Colposcopy classification of 2002**

**Figure 4.**

**Colposcopic features suggestive of invasive cancer (Suspected invasive cancer)**
